# Supplementary material for: A Disproportionality Analysis for Association of Systemic Capillary Leak Syndrome with COVID-19 Vaccination Using the World Health Organization Pharmacovigilance Database
Source: MDPI journal article supplement (doi:10.3390/vaccines10060835), 2022-05-25
Supplement: s1 [file s1]

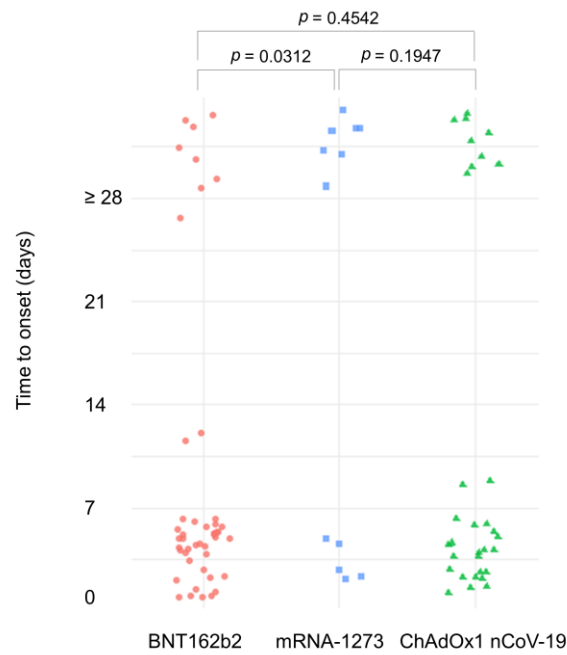

**Figure S1.** The time interval from vaccination to occurrence of systemic capillary leak syndrome for each vaccine type.

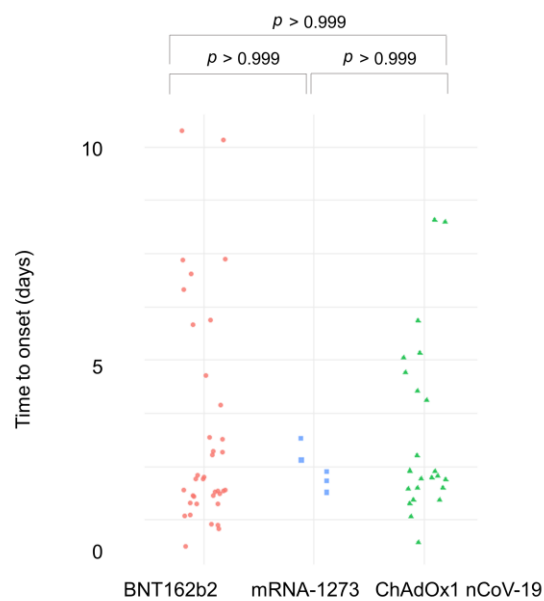

**Figure S2.** Subgroup analysis representing the time interval within 2 weeks from vaccination to occurrence of systemic capillary leak syndrome for each vaccine type.
